# Supplementary material for: Highly sensitive and specific Alu-based quantification of human cells among rodent cells
Source: PubMed Central journal article supplement (PMC5643497; doi:10.1038/s41598-017-13402-3), 2017-10-16
Supplement: 41598_2017_13402_MOESM1_ESM.pdf [file 41598_2017_13402_MOESM1_ESM.pdf]

## Supplementary Information

### Highly sensitive and specific Alu-based quantification of human cells among rodent cells

Kodai Funakoshi<sup>1</sup>, Mozhdeh Bagheri<sup>2</sup>, Ming Zhou<sup>3</sup>, Ryoji Suzuki<sup>3</sup>, Hiroshi Abe<sup>3</sup> & Hideo Akashi<sup>3,\*</sup>

<sup>1</sup>Department of Microbiology and Immunology, Tohoku University Graduate School of Medicine, 2-1 Seiryomachi, Aoba-ku, Sendai 980-8575, Japan

<sup>2</sup>Department of Molecular Pathology, Tohoku University Graduate School of Medicine, 2-1 Seiryomachi, Aoba-ku, Sendai 980-8575, Japan

<sup>3</sup>Department of Anatomy, Akita University Graduate School of Medicine, 1-1-1 Hondo, Akita 010-8543, Japan

\* To whom correspondence should be addressed. Tel: 81(Japan)-18-884-6055; Fax: 81(Japan)-18-884-6440; Email: akashi@gipc.akita-u.ac.jp

**Table S1.** Position weight matrix of the Alu consensus. The total numbers of A, G, T, and C at each position with non-redundant hits for the 46 Alu subfamily members in the Dfam 1.3 database are shown.

|           |         |         |         |         |         |         |         |         |         |         |         |         |         |         |         |         |         |         |         |         |
|-----------|---------|---------|---------|---------|---------|---------|---------|---------|---------|---------|---------|---------|---------|---------|---------|---------|---------|---------|---------|---------|
| Position  | 1       | 2       | 3       | 4       | 5       | 6       | 7       | 8       | 9       | 10      | 11      | 12      | 13      | 14      | 15      | 16      | 17      | 18      | 19      | 20      |
| Consensus | G       | G       | C       | C       | G       | G       | G       | C       | G       | C       | G       | G       | T       | G       | G       | C       | T       | C       | A       | C       |
| A         | 0       | 0       | 0       | 0       | 0       | 0       | 0       | 0       | 0       | 0       | 0       | 0       | 0       | 0       | 0       | 0       | 0       | 0       | 996,723 | 15,084  |
| G         | 996,723 | 996,723 | 0       | 0       | 996,723 | 996,723 | 996,723 | 0       | 996,723 | 0       | 996,723 | 996,723 | 0       | 996,723 | 996,723 | 0       | 0       | 0       | 0       | 0       |
| T         | 0       | 0       | 0       | 1,130   | 0       | 0       | 0       | 0       | 0       | 0       | 0       | 0       | 996,723 | 0       | 0       | 0       | 996,723 | 0       | 0       | 198,332 |
| C         | 0       | 0       | 996,723 | 995,593 | 0       | 0       | 0       | 996,723 | 0       | 996,723 | 0       | 0       | 0       | 0       | 0       | 996,723 | 0       | 996,723 | 0       | 783,307 |
| Position  | 21      | 22      | 23      | 24      | 25      | 26      | 27      | 28      | 29      | 30      | 31      | 32      | 33      | 34      | 35      | 36      | 37      | 38      | 39      | 40      |
| Consensus | G       | C       | C       | T       | G       | T       | A       | A       | T       | C       | C       | C       | A       | G       | C       | A       | C       | T       | T       | T       |
| A         | 0       | 0       | 0       | 0       | 0       | 0       | 996,723 | 996,723 | 0       | 0       | 0       | 0       | 996,723 | 0       | 0       | 996,723 | 0       | 0       | 0       | 0       |
| G         | 996,723 | 0       | 0       | 0       | 996,723 | 0       | 0       | 0       | 0       | 0       | 0       | 0       | 0       | 996,723 | 0       | 0       | 0       | 0       | 0       | 0       |
| T         | 0       | 0       | 3,654   | 996,723 | 0       | 996,723 | 0       | 0       | 996,723 | 0       | 0       | 0       | 0       | 0       | 0       | 0       | 0       | 996,723 | 996,723 | 996,723 |
| C         | 0       | 996,723 | 993,069 | 0       | 0       | 0       | 0       | 0       | 0       | 996,723 | 996,723 | 996,723 | 0       | 0       | 996,723 | 0       | 996,723 | 0       | 0       | 0       |
| Position  | 41      | 42      | 43      | 44      | 45      | 46      | 47      | 48      | 49      | 50      | 51      | 52      | 53      | 54      | 55      | 56      | 57      | 58      | 59      | 60      |
| Consensus | G       | G       | A       | A       | G       | G       | C       | C       | G       | A       | G       | C       | C       | G       | G       | C       | G       | G       | A       | C       |
| A         | 0       | 0       | 0       | 996,723 | 0       | 0       | 0       | 18,507  | 0       | 996,723 | 0       | 664     | 0       | 0       | 0       | 0       | 239,274 | 0       | 0       | 996,723 |
| G         | 996,723 | 996,723 | 996,723 | 0       | 996,723 | 996,723 | 0       | 0       | 996,723 | 996,723 | 996,059 | 0       | 996,723 | 996,723 | 996,723 | 996,723 | 0       | 996,723 | 996,723 | 0       |
| T         | 0       | 0       | 0       | 0       | 0       | 0       | 0       | 68,399  | 0       | 0       | 0       | 0       | 0       | 0       | 0       | 0       | 352,894 | 0       | 0       | 0       |
| C         | 0       | 0       | 0       | 0       | 0       | 0       | 996,723 | 909,817 | 0       | 0       | 0       | 0       | 996,723 | 0       | 0       | 0       | 404,555 | 0       | 0       | 0       |
| Position  | 61      | 62      | 63      | 64      | 65      | 66      | 67      | 68      | 69      | 70      | 71      | 72      | 73      | 74      | 75      | 76      | 77      | 78      | 79      | 80      |
| Consensus | T       | C       | A       | C       | T       | T       | G       | A       | G       | G       | T       | C       | A       | G       | G       | A       | G       | T       | T       | C       |
| A         | 0       | 0       | 757,449 | 0       | 0       | 0       | 1,130   | 996,723 | 0       | 0       | 0       | 0       | 941,190 | 32,280  | 0       | 996,723 | 0       | 208,785 | 0       | 0       |
| G         | 0       | 0       | 239,274 | 0       | 0       | 0       | 995,593 | 0       | 996,723 | 869,638 | 0       | 0       | 55,533  | 964,443 | 996,723 | 0       | 996,723 | 0       | 0       | 0       |
| T         | 996,723 | 84,732  | 0       | 24,308  | 389,508 | 695,311 | 0       | 0       | 0       | 692,037 | 0       | 0       | 0       | 0       | 0       | 0       | 787,938 | 996,723 | 0       | 0       |
| C         | 0       | 911,991 | 0       | 972,415 | 305,803 | 0       | 0       | 0       | 0       | 127,085 | 304,686 | 996,723 | 0       | 0       | 0       | 0       | 0       | 0       | 0       | 996,723 |
| Position  | 81      | 82      | 83      | 84      | 85      | 86      | 87      | 88      | 89      | 90      | 91      | 92      | 93      | 94      | 95      | 96      | 97      | 98      | 99      | 100     |
| Consensus | G       | A       | G       | A       | C       | C       | A       | G       | C       | C       | T       | G       | G       | C       | C       | A       | A       | C       | A       | T       |
| A         | 6,979   | 996,723 | 0       | 996,723 | 0       | 0       | 992,453 | 0       | 0       | 0       | 0       | 0       | 55,533  | 0       | 992,453 | 992,453 | 16,361  | 996,723 | 2,869   |         |
| G         | 989,744 | 0       | 996,723 | 0       | 0       | 0       | 787,938 | 0       | 0       | 0       | 0       | 992,453 | 936,920 | 239,274 | 0       | 0       | 14,933  | 0       | 0       |         |
| T         | 0       | 0       | 0       | 0       | 0       | 0       | 204,515 | 0       | 1,130   | 988,744 | 0       | 0       | 0       | 0       | 166,918 | 0       | 0       | 12,674  | 0       | 846,161 |
| C         | 0       | 0       | 0       | 0       | 996,723 | 996,723 | 0       | 992,453 | 991,323 | 3,709   | 0       | 0       | 753,179 | 825,535 | 0       | 0       | 948,485 | 0       | 147,693 |         |
| Position  | 101     | 102     | 103     | 104     | 105     | 106     | 107     | 108     | 109     | 110     | 111     | 112     | 113     | 114     | 115     | 116     | 117     | 118     | 119     | 120     |
| Consensus | G       | G       | T       | G       | A       | A       | A       | C       | C       | C       | C       | T       | C       | T       | T       | A       | T       | A       | C       | T       |
| A         | 153,131 | 0       | 55,533  | 65,412  | 996,723 | 843,592 | 996,723 | 0       | 0       | 0       | 0       | 0       | 0       | 0       | 0       | 0       | 0       | 996,723 | 0       | 239,274 |
| G         | 843,592 | 996,723 | 0       | 931,311 | 0       | 153,131 | 0       | 0       | 0       | 0       | 0       | 996,723 | 0       | 0       | 0       | 0       | 0       | 0       | 0       | 0       |
| T         | 0       | 0       | 875,778 | 0       | 0       | 0       | 0       | 0       | 0       | 0       | 0       | 0       | 996,723 | 0       | 996,723 | 0       | 996,723 | 0       | 0       | 757,449 |
| C         | 0       | 0       | 65,412  | 0       | 0       | 0       | 0       | 996,723 | 996,723 | 996,723 | 996,723 | 0       | 0       | 996,723 | 0       | 996,723 | 0       | 0       | 996,723 | 0       |
| Position  | 121     | 122     | 123     | 124     | 125     | 126     | 127     | 128     | 129     | 130     | 131     | 132     | 133     | -       | 134     | 135     | 136     | 137     | 138     | 139     |
| Consensus | A       | A       | A       | A       | A       | T       | A       | C       | A       | A       | A       | A       | A       | -       | T       | T       | A       | G       | C       | C       |
| A         | 996,723 | 996,723 | 996,723 | 996,723 | 984,071 | 0       | 943,486 | 0       | 996,723 | 996,723 | 996,723 | 996,723 | 996,723 | 191,481 | 0       | 0       | 996,723 | 0       | 0       | 0       |
| G         | 0       | 0       | 0       | 0       | 0       | 0       | 9,447   | 0       | 0       | 0       | 0       | 0       | 0       | 0       | 0       | 0       | 0       | 996,723 | 0       | 0       |
| T         | 0       | 0       | 0       | 0       | 0       | 996,723 | 43,790  | 112,189 | 0       | 0       | 0       | 0       | 0       | 0       | 996,723 | 984,071 | 0       | 0       | 0       | 37,597  |
| C         | 0       | 0       | 0       | 0       | 12,652  | 0       | 884,534 | 0       | 0       | 0       | 0       | 0       | 0       | 0       | 0       | 0       | 0       | 996,723 | 996,723 | 959,126 |
| Position  | 140     | 141     | 142     | 143     | 144     | 145     | 146     | 147     | 148     | 149     | 150     | 151     | 152     | 153     | 154     | 155     | 156     | 157     | 158     | 159     |
| Consensus | G       | G       | G       | C       | G       | T       | G       | G       | T       | G       | G       | C       | C       | C       | G       | T       | G       | C       | C       | T       |
| A         | 0       | 0       | 0       | 0       | 684     | 7,792   | 16,695  | 824     | 0       | 0       | 0       | 0       | 24,963  | 0       | 120,945 | 0       | 0       | 0       | 0       | 0       |
| G         | 996,723 | 996,723 | 996,723 | 0       | 996,059 | 0       | 980,028 | 995,898 | 0       | 996,723 | 996,723 | 0       | 971,760 | 333,732 | 875,778 | 0       | 996,723 | 0       | 0       | 0       |
| T         | 0       | 0       | 0       | 0       | 0       | 980,240 | 0       | 0       | 996,723 | 0       | 0       | 41,141  | 0       | 0       | 511,042 | 0       | 0       | 0       | 0       | 996,723 |
| C         | 0       | 0       | 0       | 996,723 | 0       | 8,691   | 0       | 0       | 0       | 0       | 0       | 955,582 | 0       | 662,991 | 0       | 485,681 | 0       | 996,723 | 996,723 | 0       |
| Position  | 160     | 161     | 162     | 163     | 164     | 165     | 166     | 167     | 168     | 169     | 170     | 171     | 172     | 173     | 174     | 175     | 176     | 177     | -       | 178     |
| Consensus | G       | T       | A       | A       | T       | C       | C       | C       | A       | G       | C       | T       | A       | C       | T       | C       | G       | G       | -       | G       |
| A         | 0       | 0       | 982,987 | 521,213 | 0       | 0       | 0       | 0       | 996,723 | 0       | 0       | 0       | 987,276 | 0       | 664     | 0       | 0       | 699     | 0       | 0       |
| G         | 996,723 | 0       | 13,736  | 475,510 | 0       | 0       | 0       | 0       | 0       | 996,723 | 0       | 9,447   | 0       | 333     | 344     | 996,723 | 996,723 | 0       | 0       | 996,723 |
| T         | 0       | 996,723 | 0       | 0       | 996,723 | 0       | 56,442  | 0       | 0       | 0       | 996,723 | 0       | 0       | 995,726 | 187,236 | 0       | 0       | 0       | 0       | 0       |
| C         | 0       | 0       | 0       | 0       | 0       | 996,723 | 996,723 | 940,281 | 0       | 0       | 996,723 | 0       | 0       | 996,723 | 0       | 809,143 | 0       | 0       | 0       | 0       |
| Position  | 179     | 180     | 181     | 182     | 183     | 184     | 185     | 186     | 187     | 188     | 189     | 190     | 191     | 192     | 193     | 194     | 195     | 196     | 197     | 198     |
| Consensus | A       | G       | G       | C       | T       | G       | A       | G       | G       | C       | A       | A       | G       | A       | A       | A       | A       | T       | C       | G       |
| A         | 996,723 | 0       | 0       | 0       | 0       | 0       | 996,723 | 0       | 0       | 842,181 | 0       | 0       | 996,723 | 0       | 757,449 | 996,723 | 0       | 0       | 0       | 0       |
| G         | 0       | 996,723 | 996,723 | 0       | 0       | 996,723 | 0       | 996,723 | 996,723 | 154,542 | 931,311 | 989,744 | 0       | 0       | 996,723 | 239,274 | 0       | 0       | 150,562 | 996,723 |
| T         | 0       | 0       | 0       | 0       | 996,723 | 0       | 0       | 0       | 0       | 154,542 | 0       | 0       | 0       | 0       | 0       | 0       | 0       | 996,723 | 6,979   | 0       |
| C         | 0       | 0       | 0       | 996,723 | 0       | 0       | 0       | 0       | 0       | 842,181 | 0       | 65,412  | 0       | 0       | 0       | 0       | 0       | 0       | 839,182 | 0       |
| Position  | 199     | 200     | 201     | 202     | 203     | 204     | 205     | 206     | 207     | -       | 208     | 209     | 210     | 211     | 212     | 213     | 214     | 215     | 216     | 217     |
| Consensus | C       | T       | T       | G       | A       | A       | C       | C       | C       | -       | G       | G       | G       | A       | G       | C       | C       | G       | A       | T       |
| A         | 0       | 199     | 0       | 0       | 996,723 | 757,449 | 5,417   | 0       | 5,317   | 0       | 153,330 | 199     | 5,751   | 995,032 | 2,869   | 0       | 0       | 0       | 0       | 996,723 |
| G         | 0       | 150,363 | 0       | 996,723 | 0       | 239,274 | 0       | 0       | 0       | 843,393 | 996,524 | 990,972 | 1,691   | 993,854 | 838,275 | 0       | 757,449 | 996,723 | 0       | 0       |
| T         | 0       | 846,161 | 996,723 | 0       | 0       | 0       | 0       | 89,404  | 0       | 0       | 0       | 0       | 0       | 0       | 0       | 158,448 | 239,274 | 239,274 | 0       | 0       |
| C         | 996,723 | 0       | 0       | 0       | 0       | 991,306 | 996,723 | 902,002 | 1,691   | 0       | 0       | 0       | 0       | 0       | 0       | 0       | 757,449 | 0       | 0       | 0       |
| Position  | 218     | 219     | 220     | 221     | 222     | 223     | 224     | 225     | 226     | 227     | 228     | 229     | 230     | 231     | 232     | 233     | 234     | 235     | 236     | 237     |
| Consensus | G       | G       | T       | T       | G       | C       | A       | G       | T       | G       | A       | G       | C       | C       | G       | A       | A       | A       | T       | C       |
| A         | 0       | 0       | 0       | 0       | 43,790  | 0       | 941,190 | 0       | 0       | 0       | 996,723 | 0       | 0       | 0       | 153,131 | 757,250 | 0       | 983,829 | 0       | 14,257  |
| G         | 996,723 | 846,161 | 0       | 0       | 952,933 | 0       | 55,533  | 996,723 | 0       | 996,723 | 0       | 996,723 | 0       | 334     | 843,592 | 199     | 996,723 | 12,894  | 0       | 0       |
| T         | 0       | 0       | 799,548 | 996,723 | 0       | 0       | 0       | 0       | 996,723 | 0       | 0       | 0       | 664     | 153,973 | 0       | 239,274 | 0       | 0       | 996,723 | 75,353  |
| C         | 0       | 150,562 | 197,175 | 0       | 0       | 996,723 | 0       | 0       | 0       | 0       | 0       | 0       | 996,059 | 842,416 | 0       | 0       | 0       | 0       | 0       | 907,113 |
| Position  | 238     | 239     | 240     | 241     | 242     | 243     | 244     | 245     | 246     | 247     | 248     | 249     | 250     | 251     | 252     | -       | -       | -       | -       | -       |
| Consensus | G       | C       | G       | C       | C       | A       | C       | T       | G       | C       | A       | A       | C       | T       | C       | -       | -       | -       | -       | -       |
| A         | 0       | 0       | 0       | 0       | 0       | 993,791 | 0       | 334     | 0       | 0       | 993,791 | 1,130   | 0       | 0       | 0       | 0       | 0       | 0       | 2,869   | 0       |
| G         | 977,430 | 0       | 996,723 | 0       | 0       | 0       | 0       | 0       | 993,791 | 0       | 0       | 4,189   | 0       | 0       | 2,869   | 0       | 0       | 0       | 2,869   | 0       |
| T         | 0       | 208,909 | 0       | 0       | 0       | 104,074 | 993,457 | 0       | 0       | 0       | 0       | 0       | 992,949 | 0       | 0       | 0       | 0       | 0       | 0       | 2,869   |
| C         | 19,293  | 787,814 | 0       | 996,723 | 996,723 | 0       | 889,717 | 0       | 0       | 993,791 | 0       | 988,47  |         |         |         |         |         |         |         |         |



**Table S3.** Prediction of secondary structures of heterodimers for forward and reverse primers. The primer names, e.g., “54F” and “206R” mean a forward and a reverse primer whose 5' ends start from position 54 and 206 in the Alu model sequence, respectively. “5-3t,-5.8” indicates 3 Ss in the 5-nt contiguous stem at the 3'-terminus with a free energy of -5.8 kcal/mol.

| Length |      | 20        | 20        | 21        | 20        | 21        |
|--------|------|-----------|-----------|-----------|-----------|-----------|
|        | Name | 206R      | 207R      | 207R      | 208R      | 208R      |
| 20     | 54F  | 5-2,-5.6  | 5-2,-5.6  | 5-2,-5.6  | 5-2,-5.6  | 5-2,-5.6  |
| 20     | 55F  | 5-2,-5.6  | 5-2,-5.6  | 5-2,-5.6  | 5-2,-5.6  | 5-2,-5.6  |
| 20     | 56F  | 5-2,-5.6  | 5-2,-5.6  | 5-2,-5.6  | 5-2,-5.6  | 5-2,-5.6  |
| 21     | 56F  | 5-3t,-5.8 | 5-3t,-5.7 | 5-3t,-5.8 | 5-2,-5.6  | 5-3t,-5.7 |
| 21     | 63F  | 6-4,-7.8  | 6-4t,-7.7 | 6-4,-7.8  | 5-3t,-5.8 | 6-4t,-7.7 |
| 20     | 64F  | 6-4,-7.8  | 6-4t,-7.7 | 6-4,-7.8  | 5-3t,-5.8 | 6-4t,-7.7 |
| 21     | 64F  | 6-4,-7.8  | 6-4t,-7.7 | 6-4,-7.8  | 5-3t,-5.8 | 6-4t,-7.7 |
| 20     | 101F | 4-2,-4.1  | 5-3,-5.9  | 5-3,-5.9  | 5-3,-6.0  | 5-3,-6.0  |

**Table S4.** Features of Alu-qPCR primers and probes and MegaBLAST searches for rodent and human genomes. In column “0”, the numbers of 100%-matched hits of 20-nt subsequence (for a length of 20 nt or more) or of full-length sequence (for a length of 19 nt or less) are shown. In column “-1”, the number of 100%-matched hits of 19-nt (for a length of 20 nt or more) or of length-1-nt (for a length of 19 nt or less) subsequences are shown. In column “-2”, the number of 100%-matched hits of 18-nt (length of 20 nt or more) or of length-2-nt (for a length of 19 nt or less) subsequences are shown. The following search databases were used: mouse, Genome (all assemblies top-level, Annotation Release 106); rat, Genome (all assemblies, Annotation Release 106); guinea pig, Genome (Cavpor3.0 reference Annotation Release 102); human, Genome (all assemblies top-level, Annotation Release 108). \* Tm values obtained without TaqMan-MGB effects. \*\* Hits include sequences within position 807-1566 in NW\_007906637.

| Primer or probe sequence    | Type | Length | Tm    | Mouse |     |     | Rat |     |      | Guinea pig |     |       | Human   | Ref        |
|-----------------------------|------|--------|-------|-------|-----|-----|-----|-----|------|------------|-----|-------|---------|------------|
|                             |      |        |       | 0     | -1  | -2  | 0   | -1  | -2   | 0          | -1  | -2    | 0       |            |
| CATGGTGAAACCCCGTCTCTA       | F    | 21     | 59.5  | 0     | 1   | 0   | 0   | 4   | 4    | 0          | 1   | 0     | 60,664  | 1          |
| GCCTCAGCCTCCCAGTAG          | R    | 19     | 61.5  | 7     | 20  | 197 | 23  | 41  | 310  | 91         | 316 | 3,737 | 112,211 | 1          |
| ATTAGCCGGGCGTGGTGGCG        | H    | 20     | 68.9  | 64    | 283 | 862 | 0   | 0   | 2    | 1          | 36  | 91    | 14,201  | 1          |
| GACCATCCCGGCTAAAACG         | F    | 19     | 58.6  | 0     | 0   | 0   | 0   | 0   | 0    | 0          | 0   | 0     | 5,116   | 2          |
| CGGGTTCACGCCATTCTC          | R    | 18     | 58.5  | 0     | 0   | 0   | 0   | 2** | 2    | 0          | 0   | 0     | 31,656  | 2          |
| CCCGTCTCTACTAAA             | H    | 16     | 48.5* | 0     | 0   | 2   | 1** | 2   | 15   | 0          | 1   | 1     | 107,029 | 2          |
| GTCAGGAGATCGAGACCATCCT      | F    | 22     | 60.8  | 0     | 0   | 0   | 2   | 0   | 0    | 0          | 0   | 0     | 60,769  | 3          |
| AGTGGCGCAATCTCGGC           | R    | 17     | 60.5  | 0     | 0   | 0   | 0   | 0   | 2    | 0          | 0   | 0     | 13,290  | 3          |
| AGCTACTCGGGAGGCTGAGGCAGGA   | H    | 25     | 71.4  | 176   | 48  | 46  | 248 | 91  | 108  | 3,916      | 661 | 946   | 132,529 | 3          |
| CTTGCACTGAGCCGAGATT         | F    | 19     | 57.9  | 0     | 0   | 0   | 0   | 0   | 4    | 0          | 0   | 0     | 15,552  | 4          |
| GAGACGGAGTCTCGCTGTGTC       | R    | 21     | 61.9  | 0     | 0   | 0   | 0   | 0   | 0    | 0          | 1   | 0     | 28,269  | 4          |
| ACTGCAGTCCGAGTCCGGCCT       | H    | 22     | 71.6* | 0     | 0   | 0   | 0   | 0   | 0    | 0          | 0   | 0     | 3,916   | 4          |
| GAGGCGGGCGGATCA             | F    | 15     | 58.2  | 3     | 24  | 91  | 2   | 46  | 0    | 4          | 7   | 4     | 27,211  | 5          |
| CCCGGCTAATTTTTGTATTTTTAGTAG | R    | 27     | 57.5  | 0     | 2   | 2   | 4   | 0   | 19** | 1          | 2   | 16    | 192,061 | 5          |
| CAGCCTGGCCAACATGGTGAAACC    | H    | 24     | 67.6  | 0     | 0   | 3   | 0   | 4   | 2    | 1          | 1   | 0     | 143,855 | 5          |
| GGTGAAACCCCGTCTCTACT        | F    | 20     | 58.7  | 0     | 0   | 0   | 0   | 1** | 0    | 0          | 0   | 0     | 89,063  | This study |
| GGTTCAAGCGATTCTCCTGC        | R    | 20     | 59.3  | 0     | 0   | 1   | 0   | 0   | 0    | 0          | 0   | 1     | 72,640  | This study |
| CGCCCGGCTAATTTTTGTAT        | H    | 20     | 57.8  | 0     | 0   | 1   | 0   | 0   | 0    | 0          | 0   | 1     | 9,838   | This study |

1. McBride, C., Gaupp, D. & Phinney, D. G. Quantifying levels of transplanted murine and human mesenchymal stem cells *in vivo* by real-time PCR. *Cytotherapy* **5**, 7-18 (2003).
2. Nicklas, J. A. & Buel, E. Simultaneous determination of total human and male DNA using a duplex real-time PCR assay. *J. Forensic Sci.* **51**, 1005-1015 (2006).
3. Preston Campbell, J. *et al.* TRIZOL and Alu qPCR-based quantification of metastatic seeding within the skeleton. *Sci. Rep.* **5**, 12635; 10.1038/srep12635 (2015).
4. Walker, J. A. *et al.* Multiplex polymerase chain reaction for simultaneous quantitation of human nuclear, mitochondrial, and male Y-chromosome DNA: application in human identification. *Anal. Biochem.* **337**, 89-97 (2005).
5. Zhang, W. *et al.* Development and qualification of a high sensitivity, high throughput Q-PCR assay for quantitation of residual host cell DNA in purification process intermediate and drug substance samples. *J. Pharm. Biomed. Anal.* **100**, 145-149 (2014).

**Table S5.** Applicability of our criteria to Alu-qPCR primers and MegaBLAST searches for rodent and human genomes. In column “0”, the numbers of 100%-matched hits of 20-nt subsequence (for a length of 20 nt or more) or full-length sequence (for a length of 19 nt or less) are shown. In column “-1”, the number of 100%-matched hits of 19 nt (for a length of 20 nt or more) or length-1-nt (for a length of 19 nt or less) subsequences are shown. In column “-2”, the number of 100%-matched hits of 18-nt (for a length of 20 nt or more) or of length-2-nt (for a length of 19 nt or less) subsequences are shown. The following search databases were used: mouse, Genome (all assemblies top-level, Annotation Release 106); rat, Genome (all assemblies, Annotation Release 106); guinea pig, Genome (Cavpor3.0 reference Annotation Release 102); human, Genome (all assemblies top-level, Annotation Release 108).

| Primer sequence         | Type | Length | Tm   | Criteria |    |     |    |   |    |     | Mouse |       |     | Rat |       |       | Guinea pig |       |         | Human | Ref |
|-------------------------|------|--------|------|----------|----|-----|----|---|----|-----|-------|-------|-----|-----|-------|-------|------------|-------|---------|-------|-----|
|                         |      |        |      | i        | ii | iii | iv | v | vi | vii | 0     | -1    | -2  | 0   | -1    | -2    | 0          | -1    | -2      | 0     |     |
| ACGCCTGTAATCCCAGCACTT   | F    | 21     | 62.1 | X        | X  | X   |    |   |    | 381 | 690   | 1,177 | 181 | 693 | 1,715 | 749   | 743        | 2,375 | 141,560 | 1, 5  |     |
| TCGCCAGGCTGGAGTGCA      | R    | 19     | 66.4 | X        | X  | X   |    |   |    | 0   | 0     | 5     | 0   | 0   | 21    | 0     | 0          | 85    | 80,747  | 1, 5  |     |
| TGGCTCACGCCTGTAATCCCA   | F    | 21     | 63.9 | X        | X  | X   | X  |   |    | 16  | 7     | 12    | 56  | 25  | 36    | 307   | 24         | 32    | 148,826 | 2     |     |
| GCCACTACGCCCGGCTAATTT   | R    | 21     | 63.4 | X        | X  | X   | X  |   |    | 1   | 4     | 4     | 0   | 0   | 0     | 1     | 2          | 3     | 8,449   | 2     |     |
| GTCAGGAGATCGAGACCATCCC  | F    | 22     | 61.7 | X        | X  | X   | X  |   |    | 0   | 0     | 0     | 2   | 0   | 0     | 0     | 0          | 0     | 117,628 | 3, 4  |     |
| TCCTGCCTCAGCCTCCCAAG    | R    | 20     | 63.8 | X        | X  | X   | X  | X |    | 491 | 560   | 483   | 910 | 760 | 930   | 565   | 200        | 755   | 85,430  | 3, 4  |     |
| GTCAGGAGATCGAGACCATCCC  | F    | 22     | 61.7 | X        | X  | X   | X  |   |    | 0   | 0     | 0     | 2   | 0   | 0     | 0     | 0          | 0     | 117,628 | 3, 4  |     |
| CCACTACGCCCGGCTAATTT    | R    | 20     | 60.5 | X        | X  | X   | X  |   |    | 1   | 0     | 5     | 0   | 0   | 0     | 0     | 1          | 3     | 8,414   | 4     |     |
| GTCAGGAGATCGAGACCATCCC  | F    | 22     | 61.7 | X        | X  | X   | X  |   |    | 0   | 0     | 0     | 2   | 0   | 0     | 0     | 0          | 0     | 117,628 | 3, 4  |     |
| GCTCTGTCGCCAGGCTGGAGT   | R    | 22     | 68.7 | X        | X  | X   | X  | X |    | 0   | 3     | 2     | 0   | 0   | 0     | 0     | 0          | 6     | 74,429  | 4     |     |
| CACCTGTAATCCCAGCACTTT   | F    | 21     | 58.2 | X        | X  | X   |    |   |    | 350 | 526   | 1,387 | 469 | 968 | 1,426 | 1,960 | 4,445      | 5,878 | 85,879  | 5     |     |
| CCCAGGCTGGAGTGCAGT      | R    | 18     | 61.6 | X        | X  | X   |    |   |    | 4   | 0     | 9     | 12  | 6   | 17    | 76    | 7          | 18    | 273,278 | 5     |     |
| CCTGAGGTCAGGAGTTTCGAG   | F    | 20     | 59.2 | X        | X  | X   | X  | X |    | 0   | 0     | 0     | 21  | 0   | 0     | 0     | 0          | 0     | 38,322  | 6     |     |
| CCCGAGTAGCTGGGATTACA    | R    | 20     | 58.6 | X        | X  | X   | X  | X |    | 2   | 0     | 3     | 4   | 0   | 6     | 24    | 14         | 27    | 51,754  | 6     |     |
| GTGGCTCACGCCTGTAATC     | F    | 19     | 58.6 | X        | X  | X   | X  |   |    | 18  | 14    | 18    | 35  | 62  | 37    | 433   | 44         | 25    | 157,768 | 6     |     |
| CAGGCTGGAGTGCAGTGG      | R    | 18     | 60.4 | X        | X  | X   | X  |   |    | 4   | 1     | 6     | 14  | 6   | 9     | 78    | 4          | 16    | 297,664 | 6     |     |
| CGAGCGGGTGGATCATGAGGT   | F    | 22     | 66.4 | X        | X  | X   | X  | X |    | 0   | 0     | 0     | 0   | 0   | 2     | 0     | 1          | 0     | 11,079  | 7     |     |
| TCTGTCGCCAGGCCGGACT     | R    | 20     | 68.0 | X        | X  | X   | X  |   |    | 0   | 0     | 0     | 0   | 0   | 0     | 0     | 0          | 0     | 3,845   | 7     |     |
| GAGATCGAGACCACGGTGAAA   | F    | 21     | 59.8 | X        | X  | X   | X  |   |    | 0   | 0     | 0     | 0   | 0   | 0     | 0     | 0          | 0     | 1,960   | 7     |     |
| TTTGAGACGGAGTCTCGTT     | R    | 19     | 56.0 | X        | X  | X   |    |   |    | 0   | 0     | 1     | 2   | 1   | 0     | 3     | 1          | 38    | 1,806   | 7     |     |
| CAACATAGTGAAACCCCGTCTCT | F    | 23     | 60.3 | X        | X  | X   | X  | X |    | 3   | 0     | 2     | 8   | 2   | 4     | 5     | 20         | 2     | 8,632   | 8     |     |
| GCCTCAGCCTCCCGAGTAG     | R    | 19     | 61.5 | X        | X  | X   | X  |   |    | 7   | 20    | 197   | 23  | 41  | 310   | 91    | 316        | 3,737 | 112,211 | 8     |     |

1. Mira, E., Lacalle, R. A., Gomez-Mouton, C., Leonardo, E. & Manes, S. Quantitative determination of tumor cell intravasation in a real-time polymerase chain reaction-based assay. *Clin. Exp. Metastasis* **19**, 313-318 (2002).
2. Nehmann, N., Wicklein, D., Schumacher, U. & Muller, R. Comparison of two techniques for the screening of human tumor cells in mouse blood: quantitative real-time polymerase chain reaction (qRT-PCR) versus laser scanning cytometry (LSC). *Acta Histochem.* **112**, 489-496 (2010).
3. Nicklas, J. A. & Buel, E. Development of an Alu-based, real-time PCR method for quantitation of human DNA in forensic samples. *J. Forensic Sci.* **48**, 936-944 (2003).
4. Opel, K. L., Fleishaker, E. L., Nicklas, J. A., Buel, E. & McCord, B. R. Evaluation and quantification of nuclear DNA from human telogen hairs. *J. Forensic Sci.* **53**, 853-857 (2008).
5. Schneider, T., Osl, F., Friess, T., Stockinger, H. & Scheuer, W. V. Quantification of human Alu sequences by real-time PCR--an improved method to measure therapeutic efficacy of anti-metastatic drugs in human xenotransplants. *Clin. Exp. Metastasis* **19**, 571-582 (2002).
6. Umetani, N. *et al.* Increased integrity of free circulating DNA in sera of patients with colorectal or periampullary cancer: direct quantitative PCR for ALU repeats. *Clin. Chem.* **52**, 1062-1069 (2006).
7. Walker, J. A. *et al.* Human DNA quantitation using Alu element-based polymerase chain reaction. *Anal. Biochem.* **315**, 122-128 (2003).
8. Witt, N. *et al.* An assessment of air as a source of DNA contamination encountered when performing PCR. *J. Biomol. Tech.* **20**, 236-240 (2009).



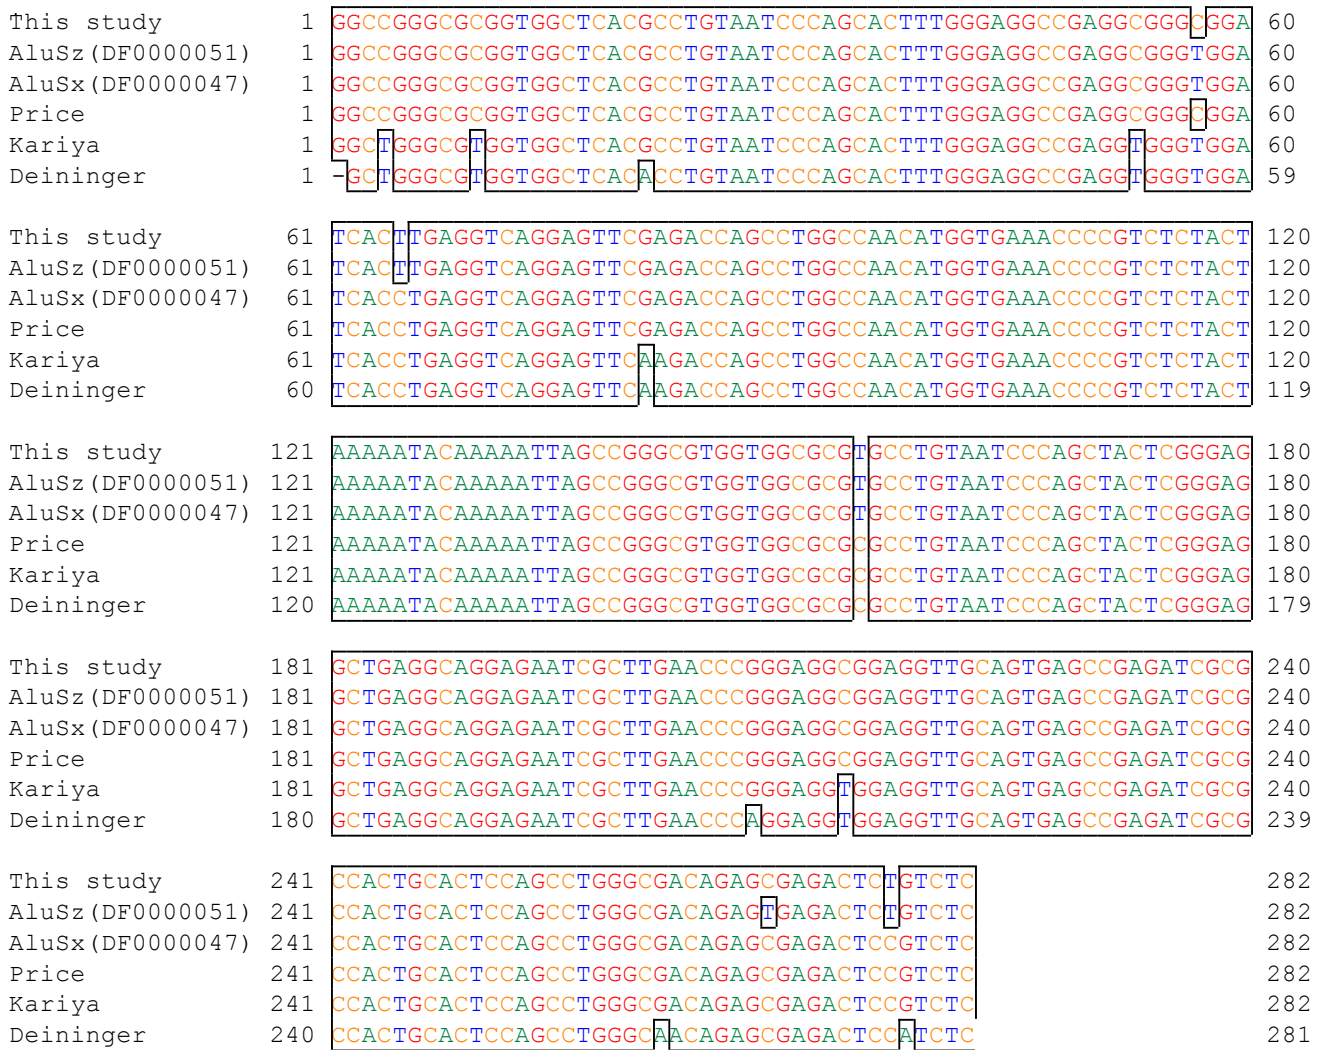

**Figure S2.** Alignment of the Alu consensus sequence. The Alu model sequences of AluSx, AluSz, Price et al., Kariya et al., Deininger et al., and this study were aligned by the ClustalW2 program. The Dfam accession numbers of AluSx and AluSz are also shown.



```

1  GGCCGGGGCGGGTGGCTCAGCCTGTAATCCAGCACTTTGGGAGGCCGA 50
   |||:|||||:|||||:|||||:|||||:|||||:|||||:|||||:|||||
2  GGCCGGGGCGGGTGGCGCAGCCTGTAGTCCAGCTACTCGGGAGGCTGA

51  GGCCGGGGGATCACTTGAGGTCAGGAGTTCGAGACCAGCCTGGCCAACAT 100
   |||:||| |||:|||||:|||||:|||||:|||||:|||||:|||||
51  GGCAGGAGGATCACTTGAGTCCAGGAGTTCGAGGCCAGCCTGGGCAACAT

101 GGTGAAACCCCGTCTCTACTAAAAATACAAAAATTAGCCGGGCGTGGTGG 150
   |:|:|:||||:||||| |||:|||||:|||||
101 AGCAAGACCCTGTCTC 116          1 AGCCGGGCGCGGTGG 15

151 CGCGTGCTGTAATCCAGCTACTCGGGAGGCTGAGGCAGGAGAATCGCT 200
   |||:|||||:|||||:|||||:|||||:|||||:|||||:|||||:|||||
16  CGCACGCTGTAGTCCAGCTACTCGGGAGGCTGAGGCAGGAGGATCACT 65

201 TGAACCCGGGAGGCGGAGGTTGCAGTGAGCCGAGATCGCGCCACTGCACT 250
   |||:|:||||: |||:|||||-----|||
66  TGAGTCCAGGAGTTCGAGG-----ACT 87

251 CCAGCCTGGGCGACAGAGCGAGACTCTGTCTCAAAAAAAAAAAAAAAAAAA 300
   |||:|||||:||||| |||:|||||:|||||:||||| |||
88  CCAGCCTGGGCAACATAGCAAGACCCTGTCTCAAAACAAAA 125

```

**Figure S3.** Local alignments of the model human Alu sequence (upper) with the mouse PB1 sequence (lower) using the Censor program. The mouse PB1 sequence was aligned with the model Alu sequence from positions 1 to 115 and from 136 to 291. The non-aligned sequence from positions 117 to 135 contained the Alu-specific A-rich sequence.

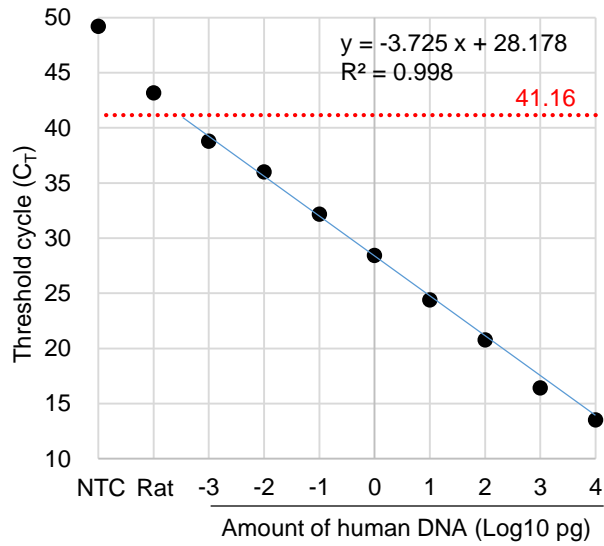

**Figure S4.** Standard curve for detecting human genomic DNA among a total of 100 ng of mixed genomic DNA from human and rat. qPCR was performed for duplicate samples in one run, and the mean  $C_T$  value was plotted. For non-detected samples, the  $C_T$  values were assumed to be 50 cycles. Negative control samples included TE buffer for the no-template control (NTC) and a sample of rat genomic DNA only (Rat). The threshold cycle of detection was set at 2 cycles below the  $C_T$  value for the sample of rodent genomic DNA only (red dotted line), and the number of cycles is shown in red. The equation for linear approximation (blue line) and the  $R^2$  value are also shown.
